# Supplementary material
Source: HighWire-hosted journal article supplement (https://bmjopen.bmj.com/content/11/2/e045345)
Supplement: inline-supplementary-material-2 [file inline-supplementary-material-2.pdf]

Appendix 2. Charting form

CHARTING FORM

ARTICLE NO:

TITLE:

AUTHOR/S:

YEAR OF PUBLICATION:

COUNTRY:

RESEARCH DESIGN:

QUANTITATIVE

QUALITATIVE

OTHER:

METHOD:

AIM:

NUMBER OF PARTICIPANTS (n=):

SETTING:

MEDICAL EDUCATION

NURSING EDUCATION

MIDWIFERY EDUCATION

PHYSIOTHERAPY EDUCATION

OCCUPATIONAL THERAPY

DENTAL EDUCATION

OTHER

DOES THE STUDY PRESENT?

|                      |     |    |
|----------------------|-----|----|
| HOW PEER ASSESSEMENT | YES | NO |
|----------------------|-----|----|

|                             |  |  |
|-----------------------------|--|--|
| INTERVENTIONS ARE DELIVERED |  |  |
|-----------------------------|--|--|

|                 |     |    |
|-----------------|-----|----|
| PEER ASSESSMENT | YES | NO |
|-----------------|-----|----|

|                      |     |    |
|----------------------|-----|----|
| FORMATIVE ASSESSMENT | YES | NO |
|----------------------|-----|----|

|                     |     |    |
|---------------------|-----|----|
| STUDENTS EXPERIENCE | YES | NO |
|---------------------|-----|----|

|                     |     |    |
|---------------------|-----|----|
| TEACHERS EXPERIENCE | YES | NO |
|---------------------|-----|----|

OTHER:

|                              |     |    |
|------------------------------|-----|----|
| OUTCOME/S OF PEER ASSESSMENT | YES | NO |
|------------------------------|-----|----|

|              |  |  |
|--------------|--|--|
| INTERVENTION |  |  |
|--------------|--|--|

|                                 |     |    |
|---------------------------------|-----|----|
| RATIONALE/S FOR PEER ASSESSMENT | YES | NO |
|---------------------------------|-----|----|

|              |  |  |
|--------------|--|--|
| INTERVENTION |  |  |
|--------------|--|--|

MAIN FINDINGS:

|                  |     |    |
|------------------|-----|----|
| <u>INCLUDED:</u> | YES | NO |
|------------------|-----|----|

REASON/S FOR EXCLUSION:

(Only to be answered if the study is to be included)

### Grading according to the Critical Appraisal Skills Program (CASP)

#### QUALITATIVE STUDIES AND SYSTEMATIC REVIEWS

LOW ☐ MODERATE ☐ HIGH ☐

#### RCT AND CASE CONTROL STUDIES

LOW ☐ MODERATE ☐ HIGH ☐

#### COHORT STUDIES

LOW ☐ MODERATE ☐ HIGH ☐

### Grading according to The Mixed Method Appraisal Tool

#### MIXED METHOD STUDIES

LOW ☐ MODERATE ☐ HIGH ☐

### Grading according to the Joanna Briggs Institute Critical Appraisal Tool

#### QUASI-EXPERIMENTAL STUDIES

LOW ☐ MODERATE ☐ HIGH ☐

#### ANALYTICAL CROSS SECTIONAL STUDIES

LOW ☐ MODERATE ☐ HIGH ☐

#### CASE REPORTS

LOW ☐ MODERATE ☐ HIGH ☐

Reviewed by:

(Signature and date)
